# Supplementary material for: Colorectal Cancer Anatomical Site and Sleep Quality
Source: MDPI journal article supplement (doi:10.3390/cancers13112578), 2021-05-25
Supplement: s1 [file s1]

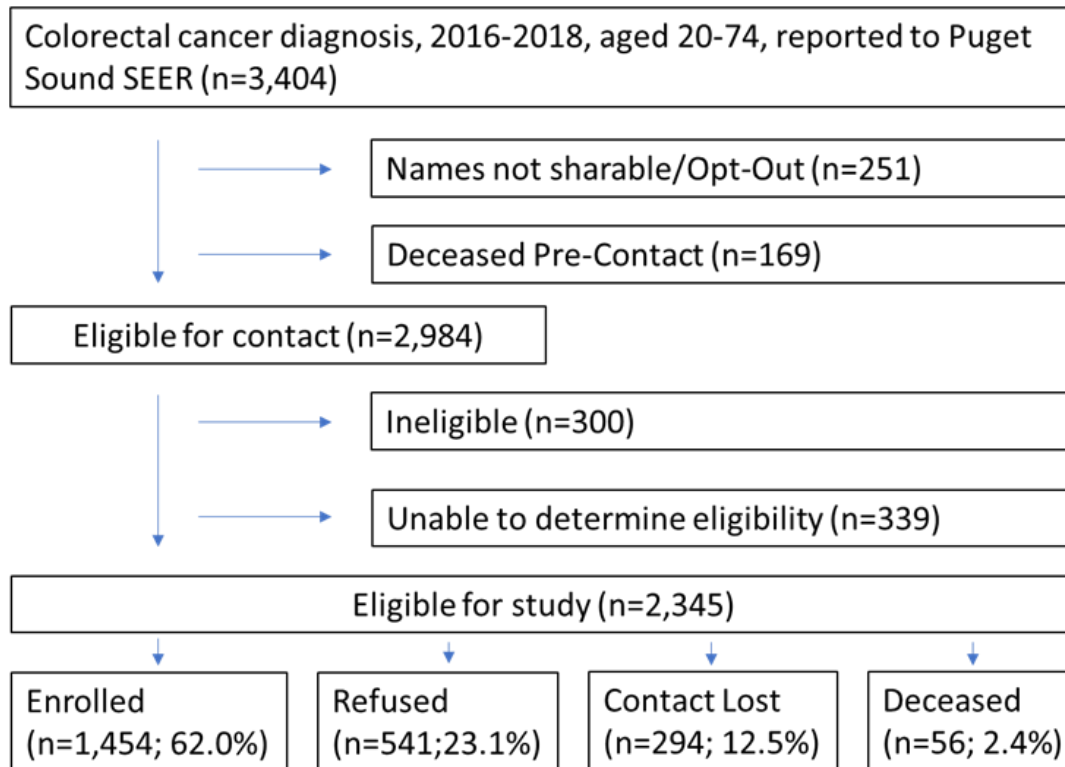

**Supplemental Figure S1.** CONSORT diagram for ACCESS study recruitment.

**Supplemental Table S1.** Association of sleep quality among regional and distant stage cancer patients compared to localized stage cancer patients (N=1453).

|                                     |          | Unadjusted OR (95% CI) | Adjusted* OR (95% CI) |
|-------------------------------------|----------|------------------------|-----------------------|
| Sleep Duration                      |          |                        |                       |
| <7 hours                            | Regional | 0.89 (0.70, 1.13)      | 0.82 (0.64, 1.04)     |
|                                     | Distant  | 0.95 (0.70, 1.30)      | 0.85 (0.62, 1.16)     |
| 7-8 hours                           | Regional | 0.75 (0.59, 0.94)      | 0.78 (0.62, 0.99)     |
|                                     | Distant  | 0.69 (0.52, 0.94)      | 0.75 (0.55, 1.01)     |
| ≥9 hours                            | Regional | 2.17 (1.55, 3.02)      | 2.27 (1.62, 3.18)     |
|                                     | Distant  | 2.20 (1.47, 3.29)      | 2.32 (1.54, 3.51)     |
| Problems Staying Awake              |          |                        |                       |
|                                     | Regional | 1.52 (1.08, 2.15)      | 1.43 (1.00, 2.02)     |
|                                     | Distant  | 1.46 (0.95, 2.26)      | 1.28 (0.82, 1.99)     |
| Poor Sleep Quality                  |          |                        |                       |
|                                     | Regional | 1.28 (0.96, 1.69)      | 1.19 (0.89, 1.58)     |
|                                     | Distant  | 1.40 (0.99, 1.98)      | 1.25 (0.87, 1.78)     |
| Sleep Medication Use                |          |                        |                       |
|                                     | Regional | 1.53 (1.09, 2.16)      | 1.52 (1.08, 2.16)     |
|                                     | Distant  | 2.17 (1.43, 3.29)      | 2.13 (1.38, 3.27)     |
| Trouble Sleeping                    |          |                        |                       |
| <i>Any problems</i>                 |          |                        |                       |
|                                     | Regional | 1.25 (0.95, 1.64)      | 1.15 (0.87, 1.52)     |
|                                     | Distant  | 1.51 (1.05, 2.18)      | 1.38 (0.95, 2.01)     |
| <i>No sleep within 30 minutes</i>   |          |                        |                       |
|                                     | Regional | 1.23 (0.89, 1.68)      | 1.13 (0.82, 1.56)     |
|                                     | Distant  | 2.08 (1.45, 2.99)      | 1.81 (1.25, 2.62)     |
| <i>Waking up in middle of sleep</i> |          |                        |                       |
|                                     | Regional | 0.95 (0.73, 1.24)      | 0.89 (0.68, 1.17)     |
|                                     | Distant  | 1.01 (0.72, 1.41)      | 0.92 (0.65, 1.29)     |
| <i>Use the bathroom</i>             |          |                        |                       |
|                                     | Regional | 1.06 (0.82, 1.36)      | 1.05 (0.81, 1.35)     |
|                                     | Distant  | 0.81 (0.59, 1.13)      | 0.85 (0.61, 1.19)     |
| <i>Pain</i>                         |          |                        |                       |
|                                     | Regional | 0.98 (0.70, 1.36)      | 0.92 (0.65, 1.28)     |
|                                     | Distant  | 1.09 (0.73, 1.64)      | 1.02 (0.67, 1.55)     |
| <i>Breathing/Cough/Snore</i>        |          |                        |                       |
|                                     | Regional | 0.80 (0.44, 1.44)      | 0.75 (0.41, 1.37)     |
|                                     | Distant  | 0.66 (0.29, 1.50)      | 0.55 (0.24, 1.27)     |
| Change in Sleep                     |          |                        |                       |
|                                     | Regional | 2.24 (1.66, 3.04)      | 2.15 (1.58, 2.94)     |
|                                     | Distant  | 2.65 (1.85, 3.80)      | 2.50 (1.73, 3.62)     |

\*Adjusted for age at diagnosis (years), sex (male, female), education (high school or less, some college, college graduate or higher), cancer site (colon, rectal) and time since diagnosis (months).

**Supplemental Table S2.** Association of sleep quality among rectal cancer patients compared to colon cancer patients stratified by cancer stage (N=1453).

|                        |                                     | Unadjusted OR (95% CI) | Adjusted* OR (95% CI) |
|------------------------|-------------------------------------|------------------------|-----------------------|
| Sleep Duration         |                                     |                        |                       |
| <7 hours               |                                     |                        |                       |
|                        | Localized                           | 1.56 (1.07, 2.28)      | 1.47 (0.99, 2.16)     |
|                        | Regional                            | 1.13 (0.81, 1.59)      | 0.96 (0.67, 1.37)     |
|                        | Distant                             | 1.03 (0.60, 1.76)      | 1.01 (0.58, 1.75)     |
| 7-8 hours              |                                     |                        |                       |
|                        | Localized                           | 0.69 (0.48, 1.00)      | 0.71 (0.48, 1.03)     |
|                        | Regional                            | 0.88 (0.64, 1.22)      | 1.02 (0.73, 1.43)     |
|                        | Distant                             | 0.96 (0.57, 1.61)      | 0.92 (0.54, 1.57)     |
| ≥9 hours               |                                     |                        |                       |
|                        | Localized                           | 0.87 (0.48, 1.58)      | 1.00 (0.54, 1.88)     |
|                        | Regional                            | 1.03 (0.69, 1.52)      | 1.03 (0.69, 1.56)     |
|                        | Distant                             | 1.02 (0.55, 1.92)      | 1.15 (0.60, 2.22)     |
| Problems Staying Awake |                                     |                        |                       |
|                        | Localized                           | 0.90 (0.49, 1.64)      | 0.91 (0.49, 1.67)     |
|                        | Regional                            | 1.03 (0.66, 1.59)      | 0.88 (0.56, 1.40)     |
|                        | Distant                             | 0.61 (0.28, 1.32)      | 0.53 (0.24, 1.17)     |
| Poor Sleep Quality     |                                     |                        |                       |
|                        | Localized                           | 1.88 (1.20, 2.94)      | 1.75 (1.10, 2.79)     |
|                        | Regional                            | 1.12 (0.77, 1.63)      | 0.97 (0.65, 1.42)     |
|                        | Distant                             | 1.16 (0.65, 2.08)      | 1.15 (0.63, 2.10)     |
| Sleep Medication Use   |                                     |                        |                       |
|                        | Localized                           | 1.24 (0.70, 2.18)      | 1.40 (0.77, 2.53)     |
|                        | Regional                            | 0.86 (0.55, 1.36)      | 0.93 (0.57, 1.52)     |
|                        | Distant                             | 1.32 (0.67, 2.59)      | 1.27 (0.63, 2.55)     |
| Trouble Sleeping       |                                     |                        |                       |
|                        | <i>Any problems</i>                 |                        |                       |
|                        | Localized                           | 1.92 (1.22, 3.04)      | 1.87 (1.17, 3.00)     |
|                        | Regional                            | 1.37 (0.92, 2.05)      | 1.33 (0.88, 2.01)     |
|                        | Distant                             | 1.83 (0.90, 3.72)      | 1.53 (0.74, 3.19)     |
|                        | <i>No sleep within 30 minutes</i>   |                        |                       |
|                        | Localized                           |                        |                       |
|                        | Regional                            | 1.37 (0.82, 2.28)      | 1.26 (0.75, 2.13)     |
|                        | Distant                             | 1.17 (0.77, 1.79)      | 1.11 (0.72, 1.71)     |
|                        |                                     | 1.38 (0.78, 2.44)      | 1.15 (0.62, 2.10)     |
|                        | <i>Waking up in middle of sleep</i> |                        |                       |
|                        | Localized                           | 1.38 (0.91, 2.10)      | 1.38 (0.89, 2.12)     |
|                        | Regional                            | 0.94 (0.65, 1.36)      | 0.86 (0.59, 1.27)     |
|                        | Distant                             | 1.53 (0.87, 2.69)      | 1.28 (0.70, 2.32)     |
|                        | <i>Use the bathroom</i>             |                        |                       |
|                        | Localized                           | 1.54 (1.03, 2.31)      | 1.66 (1.09, 2.51)     |
|                        | Regional                            | 1.25 (0.88, 1.77)      | 1.26 (0.88, 1.81)     |
|                        | Distant                             | 1.87 (1.06, 3.28)      | 2.10 (1.16, 3.81)     |
|                        | <i>Pain</i>                         |                        |                       |
|                        | Localized                           | 1.46 (0.87, 2.46)      | 1.49 (0.87, 2.55)     |
|                        | Regional                            | 1.73 (1.09, 2.72)      | 1.58 (0.98, 2.54)     |
|                        | Distant                             | 1.57 (0.80, 3.08)      | 1.36 (0.67, 2.77)     |
|                        | <i>Breathing/Cough/Snore</i>        |                        |                       |
|                        | Localized                           | 0.77 (0.29, 2.00)      | 0.73 (0.28, 1.96)     |
|                        | Regional                            | 0.53 (0.21, 1.38)      | 0.39 (0.14, 1.08)     |
|                        | Distant                             | 0.64 (0.13, 3.22)      | 0.46 (0.09, 2.47)     |

Change in Sleep

|           |                   |                   |
|-----------|-------------------|-------------------|
| Localized | 2.12 (1.27, 3.55) | 1.91 (1.12, 3.23) |
| Regional  | 1.33 (0.93, 1.92) | 1.23 (0.85, 1.80) |
| Distant   | 1.23 (0.71, 2.13) | 1.29 (0.73, 2.30) |

---

\*Adjusted for age at diagnosis (years), sex (male, female), education (high school or less, some college, college graduate or higher) and time since diagnosis (months).

**Supplemental Table S3.** Association of sleep quality among rectal cancer patients compared to colon cancer patients with chemotherapy and radiation data (N=1148).

|                                 | Unadjusted OR (95%<br>CI) | Adjusted 2 <sup>a</sup> OR (95%<br>CI) |
|---------------------------------|---------------------------|----------------------------------------|
| <b>Sleep Duration</b>           |                           |                                        |
| <7 hours                        | 1.39 (1.07, 1.81)         | 1.26 (0.90, 1.77)                      |
| 7-8 hours                       | 0.81 (0.63, 1.05)         | 0.92 (0.66, 1.27)                      |
| ≥9 hours                        | 0.85 (0.60, 1.20)         | 0.79 (0.50, 1.24)                      |
| <b>Problems Staying Awake</b>   | 0.98 (0.67, 1.41)         | 0.82 (0.51, 1.34)                      |
| <b>Poor Sleep Quality</b>       | 1.61 (1.20, 2.17)         | 1.32 (0.89, 1.94)                      |
| <b>Sleep Medication Use</b>     | 1.10 (0.76, 1.59)         | 1.31 (0.81, 2.10)                      |
| <b>Trouble Sleeping</b>         |                           |                                        |
| Any problems                    | 1.98 (1.42, 2.77)         | 1.80 (1.18, 2.73)                      |
| No sleep within 30 minutes      | 1.32 (0.96, 1.82)         | 1.10 (0.72, 1.66)                      |
| Waking up in middle of<br>sleep | 1.40 (1.06, 1.86)         | 1.40 (0.98, 2.01)                      |
| Use the bathroom                | 1.82 (1.39, 2.39)         | 1.85 (1.31, 2.63)                      |
| Pain                            | 1.74 (1.24, 2.44)         | 1.55 (0.99, 2.41)                      |
| Breathing/Cough/Snore           | 0.58 (0.28, 1.23)         | 0.66 (0.27, 1.63)                      |
| <b>Change in Sleep</b>          | 1.50 (1.11, 2.03)         | 1.18 (0.79, 1.77)                      |

<sup>a</sup> Adjusted for age at diagnosis (years), sex (male, female), BMI (kg/m<sup>2</sup>), education (high school or less, some college, college graduate or higher), cancer stage at diagnosis (localized, regional, distant), chemotherapy (yes, no), radiation (yes, no) and time since diagnosis (months).
